# Supplementary material for: Differential response for multiple ions: a smart probe to construct optically tunable molecular logic systems
Source: Royal Society of Chemistry journal article supplement (doi:10.1039/d2an01945k), 2023-01-01
Supplement: d2an01945k1.pdf [file d2an01945k1.pdf]

**Supporting Information for**  
**Smart Molecular Logic System Guided by ppb Level Detection of**  
**Hg<sup>2+</sup> Ions**

Monaj Karar,<sup>a,†</sup> Rikitha S Fernandes,<sup>b,†</sup> Nilanjan Dey<sup>b</sup>

<sup>a</sup>Department of Humanities and Science, MLR Institute of Technology, Hyderabad, Telangana-500 043, India

<sup>a</sup>Department of Chemistry, Birla Institute of Technology and Science Pilani, Hyderabad, Telangana-500078, India

\*Email: [nilanjandey.iisc@gmail.com](mailto:nilanjandey.iisc@gmail.com), [nilanjan@hyderabad.bits-pilani.ac.in](mailto:nilanjan@hyderabad.bits-pilani.ac.in)

<sup>†</sup>Both the authors equally contribute to this work

## Synthesis and Characterization Data

**Synthesis:** The precursors 1,10-phenanthroline-2,9-dicarbaldehyde (**3**) and rhodamine hydrazine (**2**) were synthesized following the literature reported procedure.

The precursor 1,10-phenanthroline-2,9-dicarbaldehyde **3** (50 mg, 0.21 mmol) was taken in EtOH with the Rhodamine hydrazine **2** (210 mg, 0.46 mmol). To this, 2-3 drops of glacial acetic acid was added and refluxed at 75°C for 12 h. The resultant precipitate was filtered and washed with EtOH.

**Characterization:** Pinkish-white solid; (yield: 122 mg, 52%); IR (neat,  $\text{cm}^{-1}$ ): 3321.0, 2930.5, 1650.4, 1530.1, 1275.2, 1220.4, 1015.0, 750.3;  $^1\text{H}$  NMR (400 MHz,  $\text{DMSO-}d_6$ )  $\delta$  (ppm): 9.32 (s, 2H), 8.36 (d,  $J = 8$  Hz, 2H), 8.15 (d,  $J = 8$  Hz, 2H), 8.08 (s, 2H), 7.74-7.55 (m, 4H), 7.33 (s, 2H), 7.22 (m, 2H), 6.64 (d,  $J = 8$  Hz, 4H), 6.29 (d,  $J = 8$  Hz, 4H), 3.39 (q,  $J = 8$  Hz, 16H), 1.22 (t,  $J = 8$  Hz, 24H);  $^{13}\text{C}$  NMR (100 MHz,  $\text{DMSO-}d_6$ )  $\delta$  (ppm): 12.690, 44.337, 66.422, 98.551, 106.261, 107.930, 120.342, 123.617, 127.550, 128.160, 128.662, 128.844, 133.510, 136.121, 145.245, 148.773, 152.188, 153.267, 155.469, 165.073; HRMS  $m/z$  calcd for  $\text{C}_{70}\text{H}_{68}\text{N}_{10}\text{O}_4$  ( $\text{M} + \text{Na}$ ) $^+$  1135.5323, found 1135.5325; anal. calcd for  $\text{C}_{70}\text{H}_{68}\text{N}_{10}\text{O}_4$ : C, 75.52; H, 6.16; N, 12.58%. Found: C, 75.2178; H, 6.1436; N, 12.5368%.

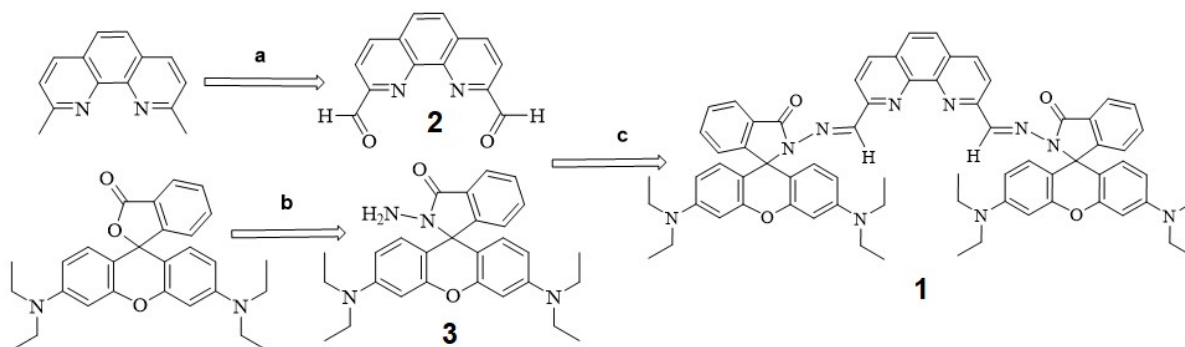

a.  $\text{SeO}_2$ , Dioxane reflux, 2h. (Yield: 55 %); b.  $\text{N}_2\text{H}_4\cdot\text{H}_2\text{O}$ , EtOH, rt. (Yield: 72 %); c. MeOH, stir., rt. (Yield: 85 %)

**Scheme S1.** Synthesis scheme of probe **1**.

### Characterization Data

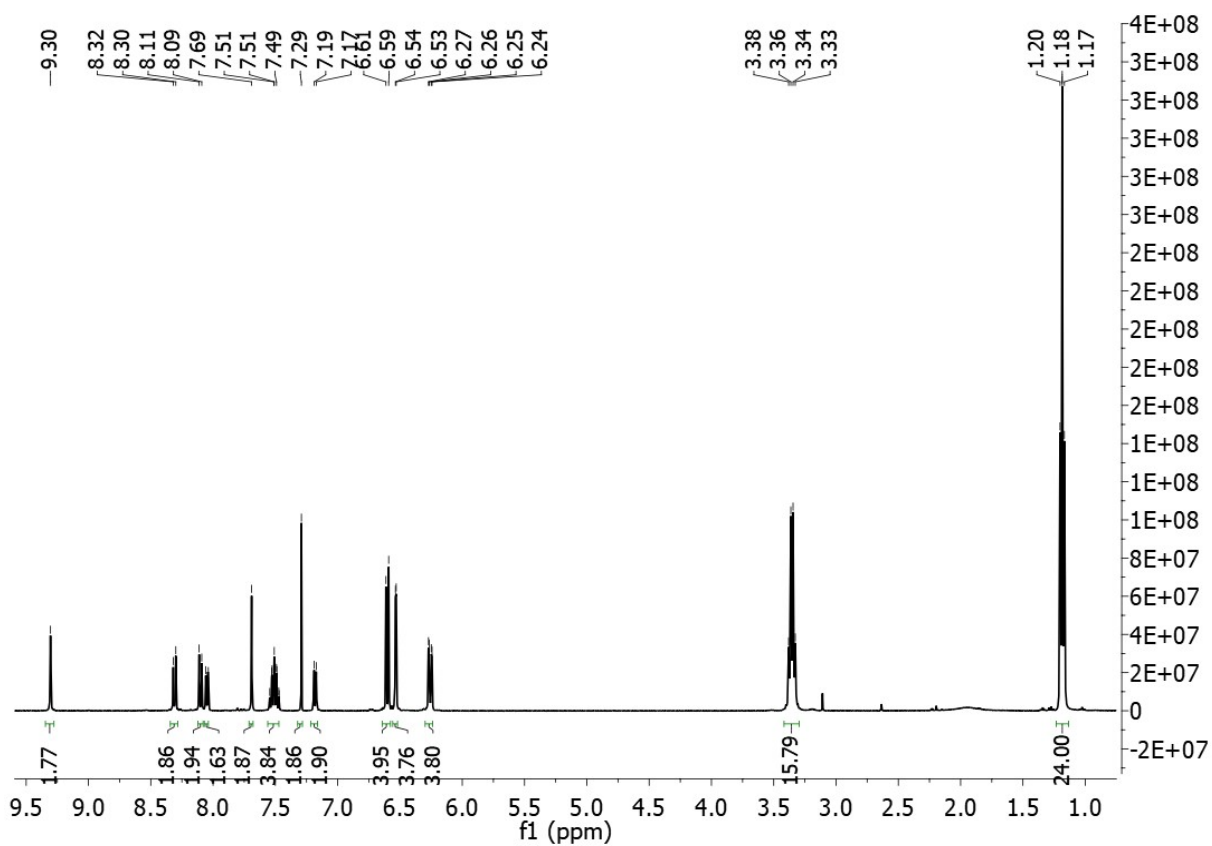

**Fig. S1** <sup>1</sup>H-NMR spectrum of **1** in DMSO-d<sub>6</sub> medium.

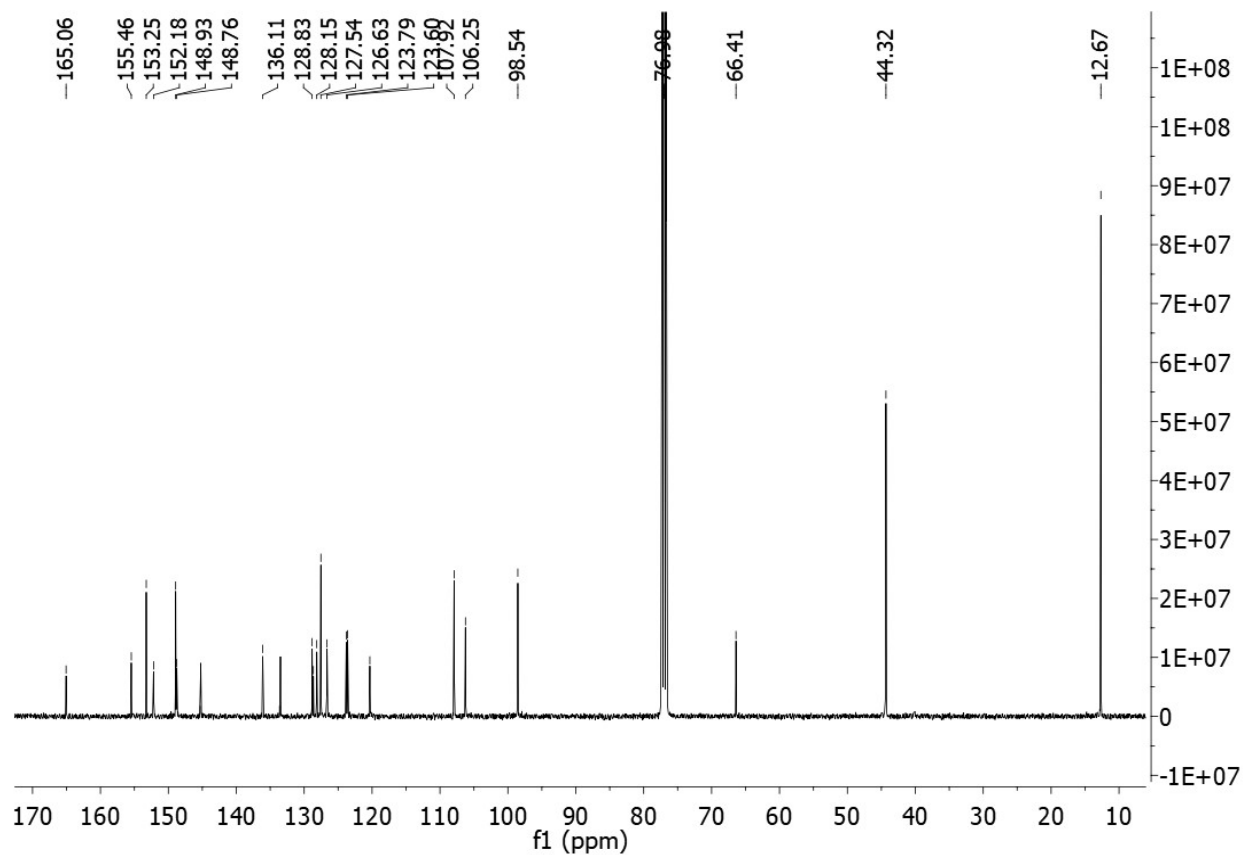

**Fig. S2**  $^{13}\text{C}$ -NMR spectrum of **1** in  $\text{DMSO-d}_6$  medium.

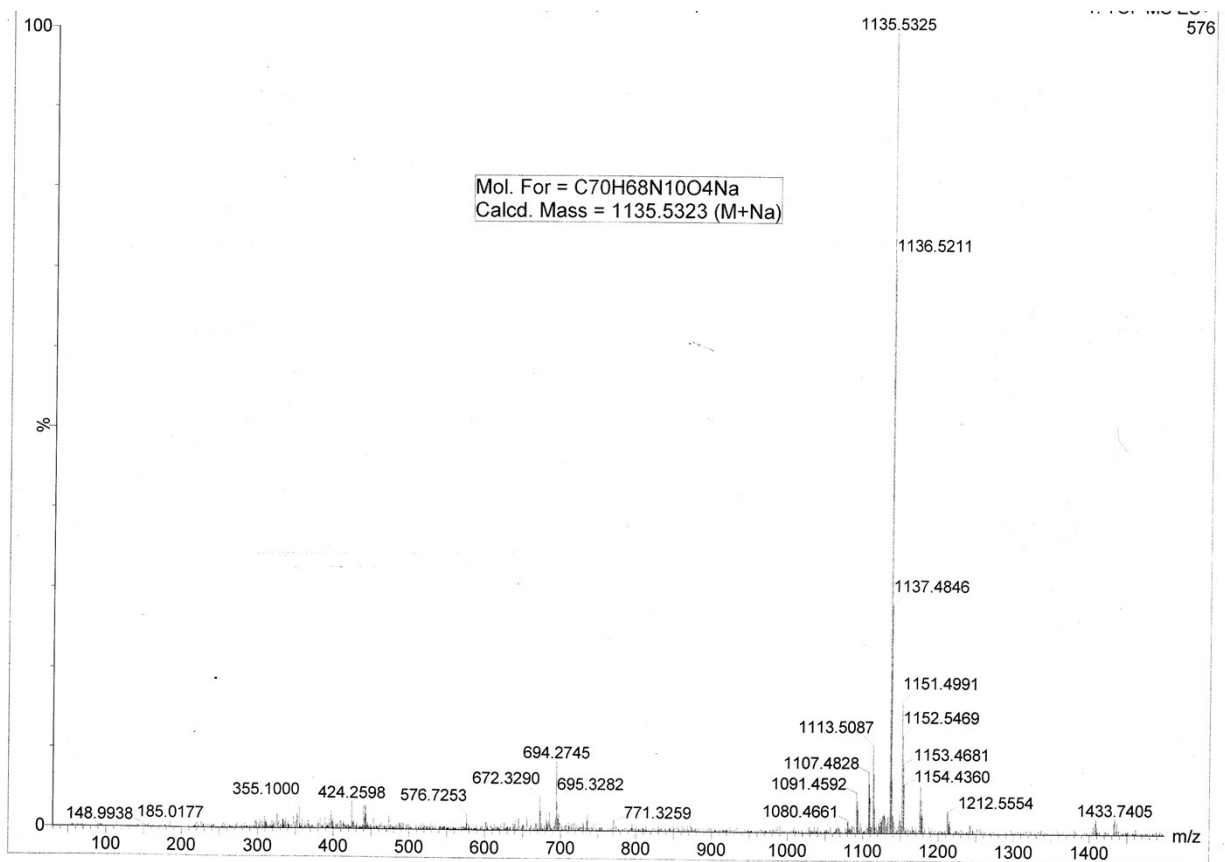

**Fig. S3** HRMS mass spectrum of **1**.

### Additional Spectral Data

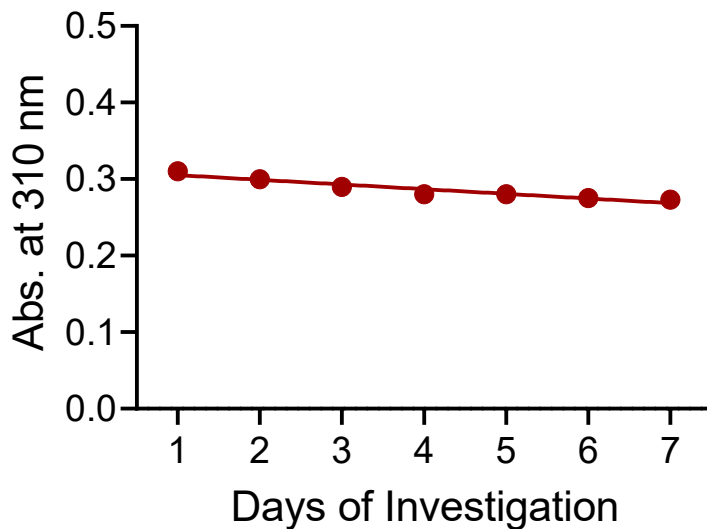

**Fig. S4** Absorbance of **1** at 310 nm at different time-periods.

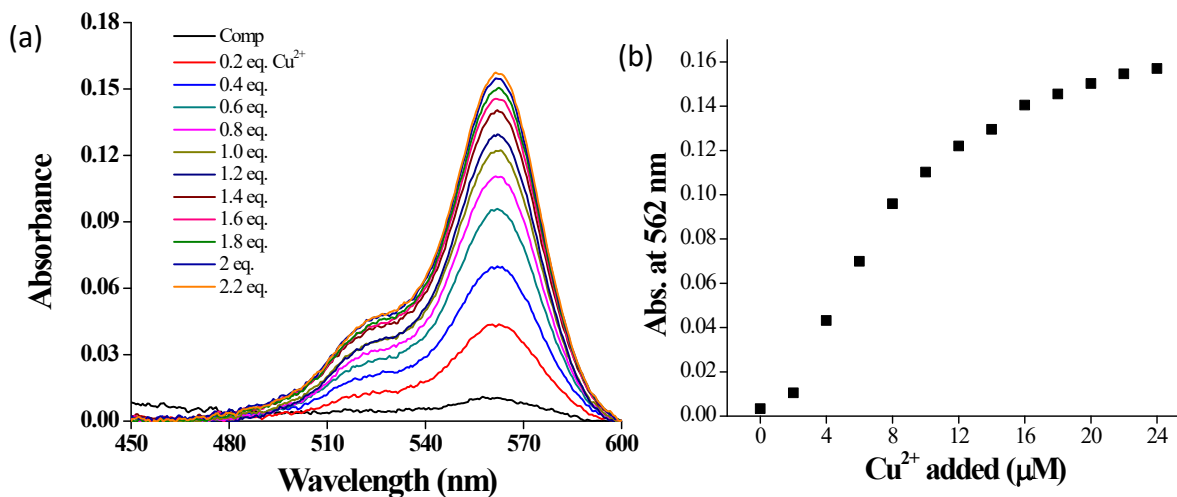

**Fig. S5** (a) UV-vis titration of **1** (10 μM) in acetonitrile-water pH 7.4 (1:1) with the gradual addition of Cu<sup>2+</sup>. (b) Plot of the absorbance of **1** (10 μM) at 562 nm with added Cu<sup>2+</sup> in μM.

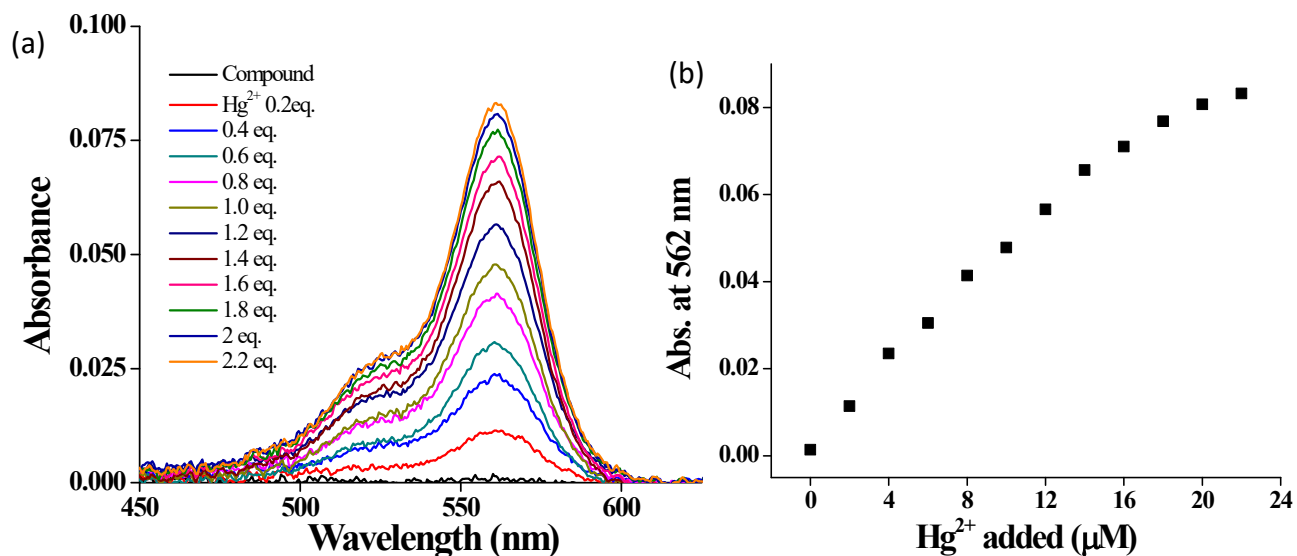

**Fig. S6** (a) UV-vis titration of **1** (10  $\mu\text{M}$ ) in acetonitrile-water pH 7.4 (1:1) with the gradual addition of  $\text{Hg}^{2+}$ . (b) Plot of the absorbance of **1** (10  $\mu\text{M}$ ) at 562 nm with added  $\text{Hg}^{2+}$  in  $\mu\text{M}$ .

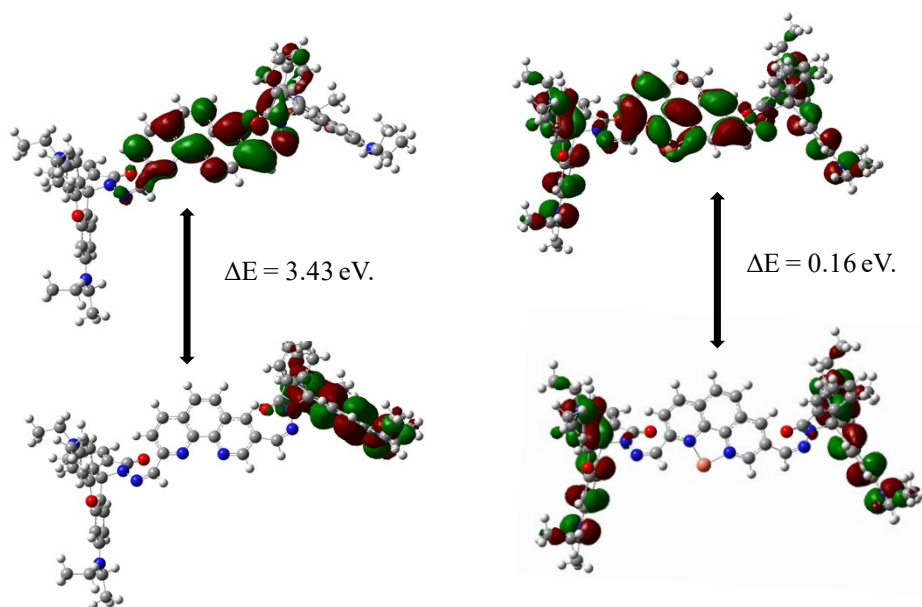

**Fig. S7** Calculation of HOMO-LUMO energy gap of (a) **1** (b) **1** +  $\text{Hg}^{2+}$  using B3LYP/6-31G\* level of theory for C, H, N, O atoms and LANL2DZ for Hg.

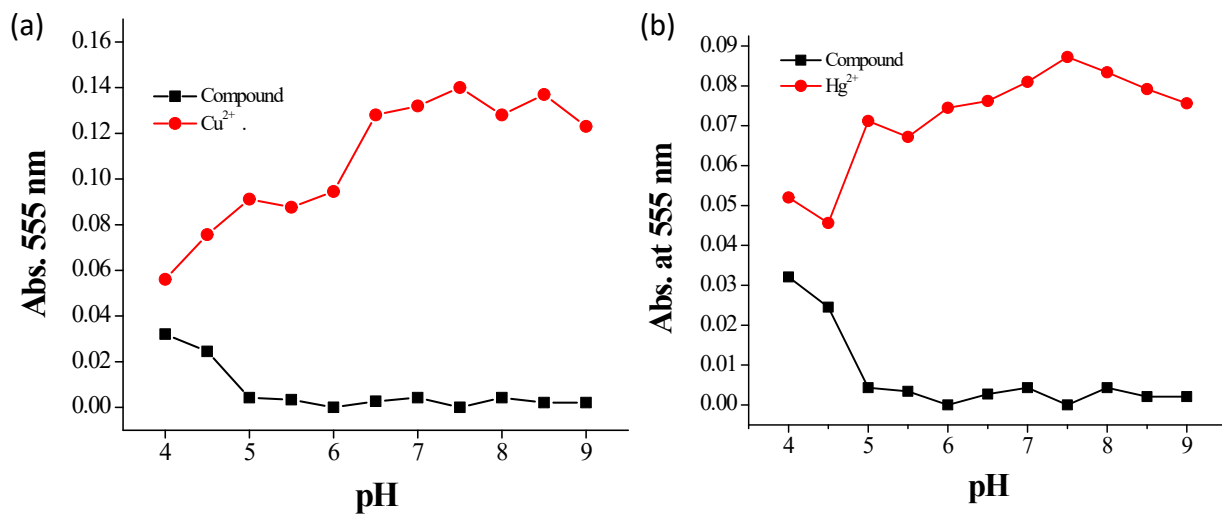

**Fig. S8** Effect of pH on the response of **1** towards (a) Cu<sup>2+</sup> and (b) Hg<sup>2+</sup> in acetonitrile-water (1:1) medium monitored at 555 nm.

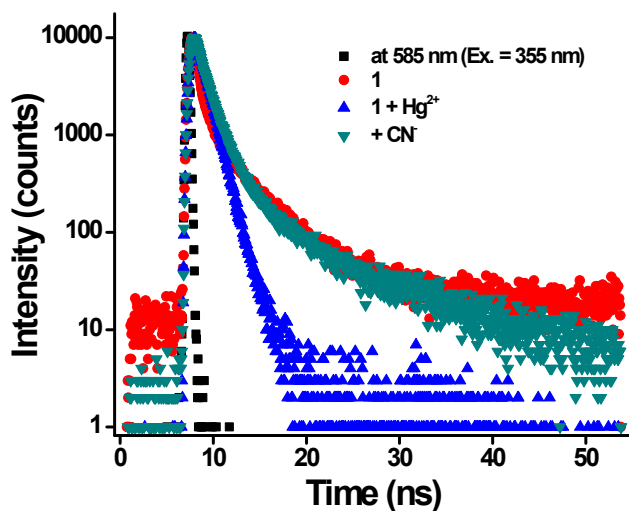

**Fig. S9 (a)** Fluorescence decay plot of **1** (5 μM, λ<sub>ex</sub> = 355 nm) in acetonitrile-water (pH 7.4) 1:1 medium (λ<sub>ex</sub> = 510 nm) with addition of Hg<sup>2+</sup> and CN<sup>-</sup> ion.



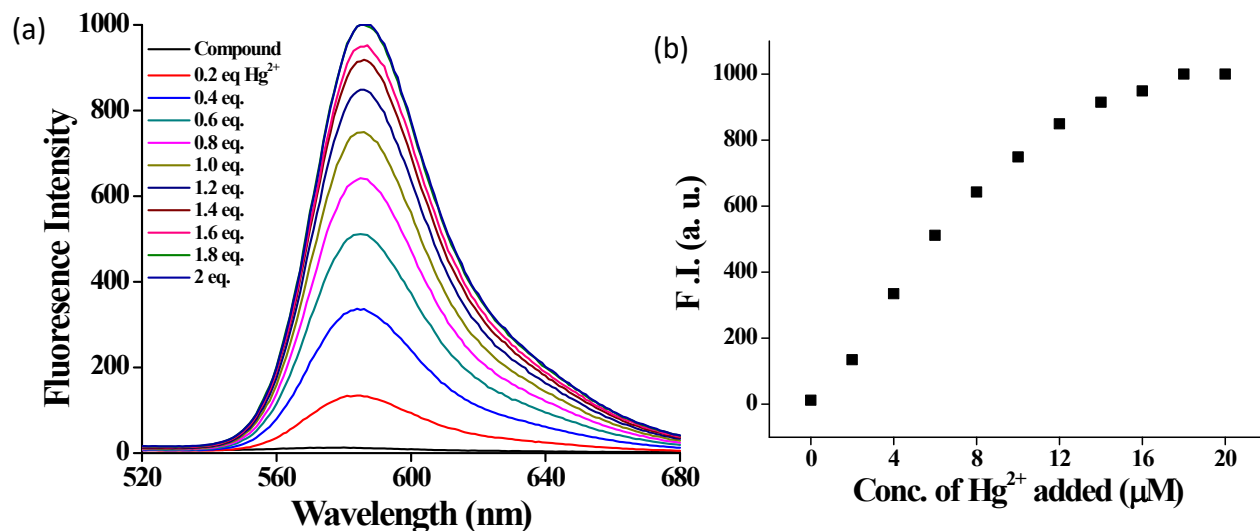

**Fig. S10** (a) Fluorescence titration of **1** (5  $\mu\text{M}$ ) in acetonitrile-water (pH 7.4) 1:1 medium ( $\lambda_{\text{ex.}} = 355 \text{ nm}$ ) with the gradual addition of  $\text{Hg}^{2+}$ . (b) Plot of the fluorescence intensity at 585 with added  $\text{Hg}^{2+}$  ion in  $\mu\text{M}$ .

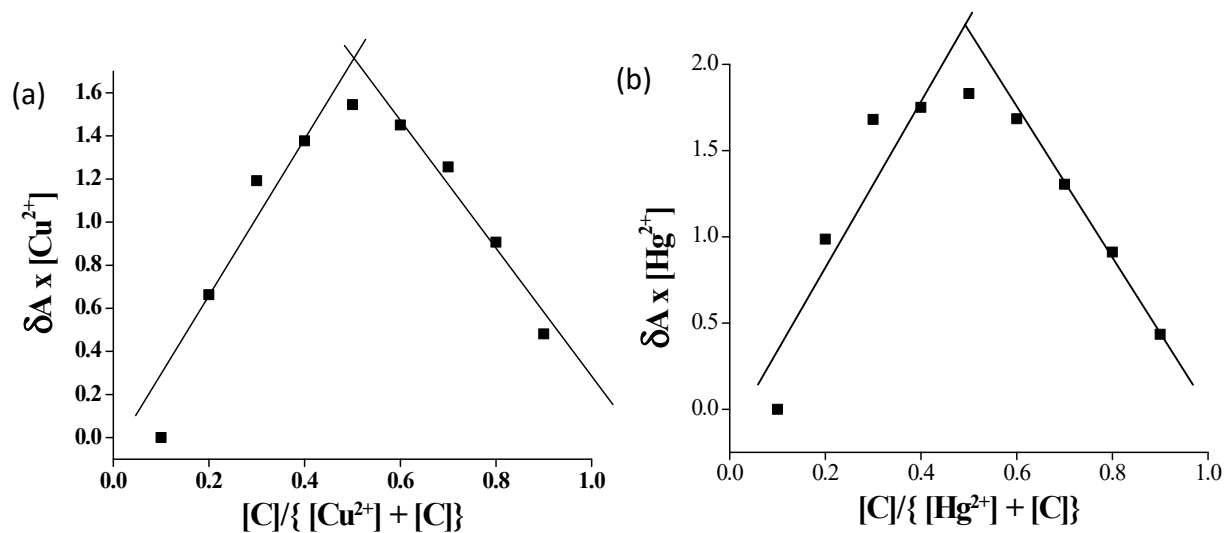

**Fig. S11** Job's plot of **1** with  $\text{Cu}^{2+}$  and  $\text{Hg}^{2+}$  in Acetonitrile-water 1:1 medium (pH 7.4) For Job's plot the total concentration  $[\mathbf{1}] + [\text{M}^{2+}] = 1.0 \times 10^{-4} \text{ M}$ .

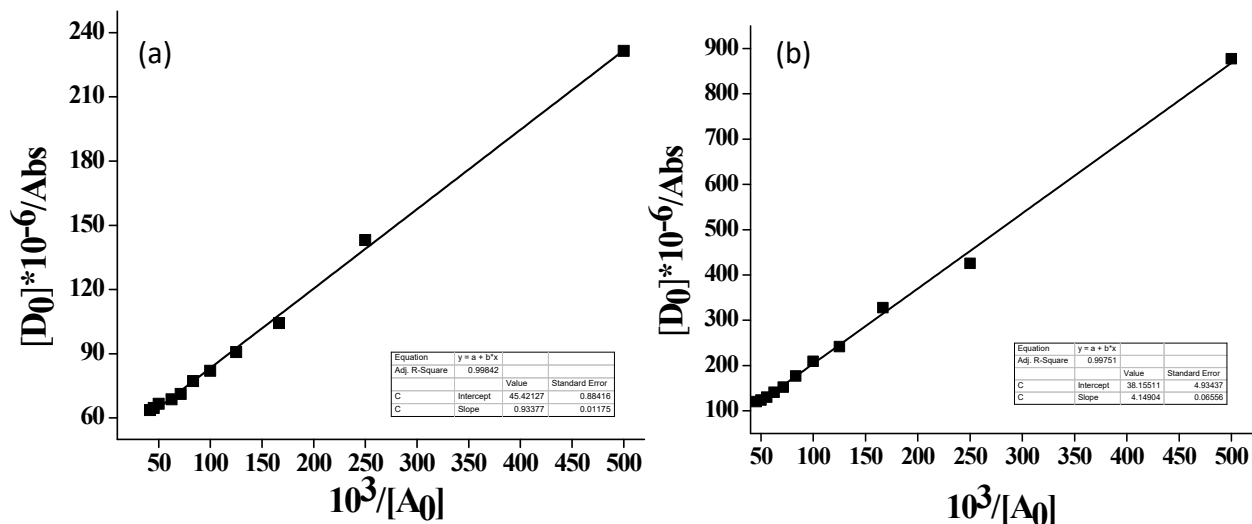

**Fig. S12** Calculation of binding constant of **1** with (a) Hg<sup>2+</sup> (b) Cu<sup>2+</sup> using Benesi-Hildebrand method for 1:1 binding.

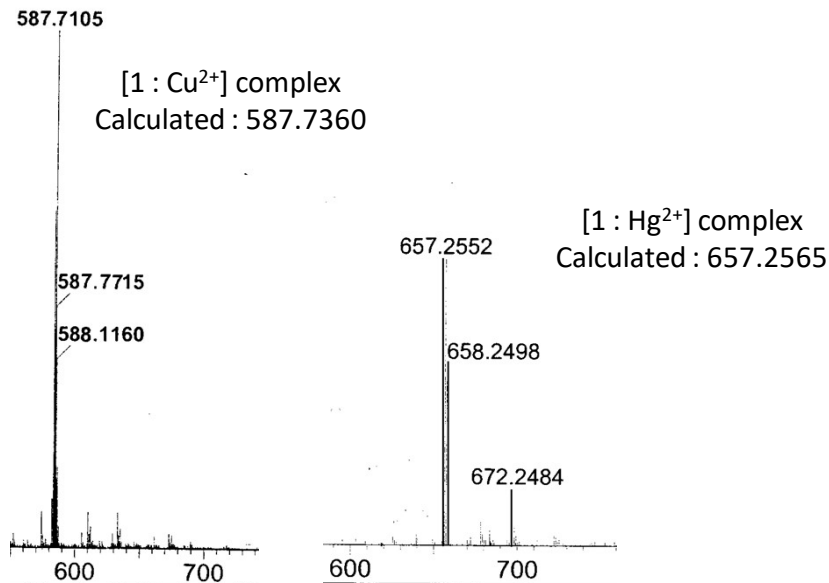

**Fig. S13** ESI-MS spectra of **1** with Cu<sup>2+</sup> and Hg<sup>2+</sup> in Acetonitrile-water 1:1 medium (pH 7.4).

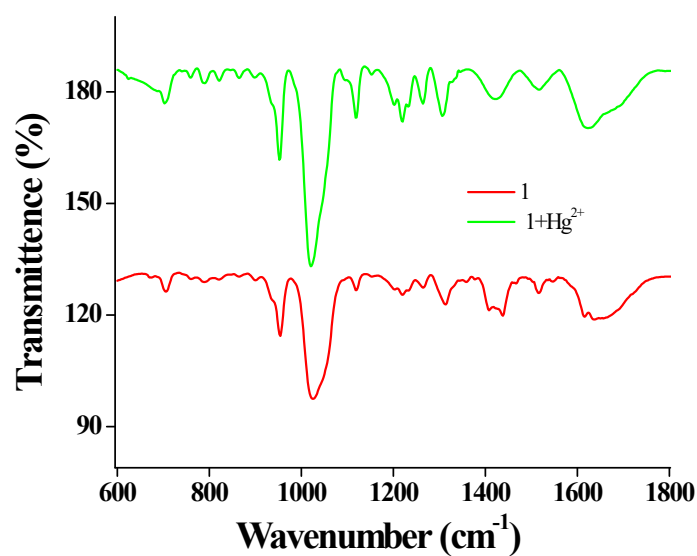

**Fig. S14** FT-IR spectra of **1** in presence of Hg<sup>2+</sup> in 1:1 acetonitrile-water medium.

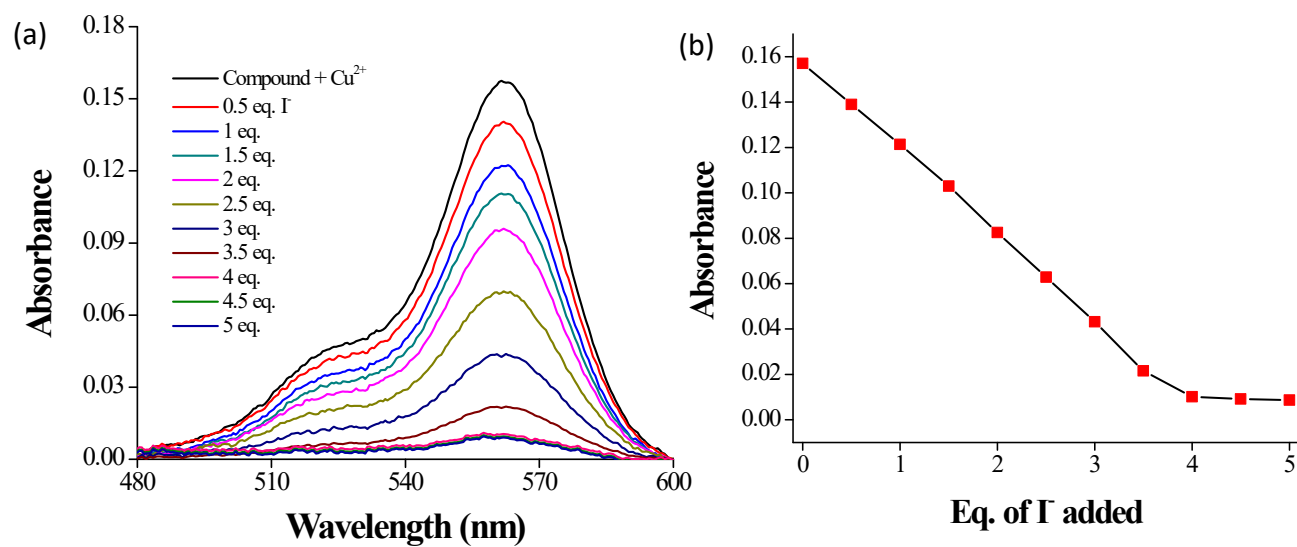

**Fig. S15** (a) UV-vis titration of **1** (10  $\mu$ M) in acetonitrile-water pH 7.4 (1:1) with the gradual addition of I<sup>-</sup> in presence of Cu<sup>2+</sup> (1:1). (b) Plot of the absorbance at 562 nm with added I<sup>-</sup> in  $\mu$ M.

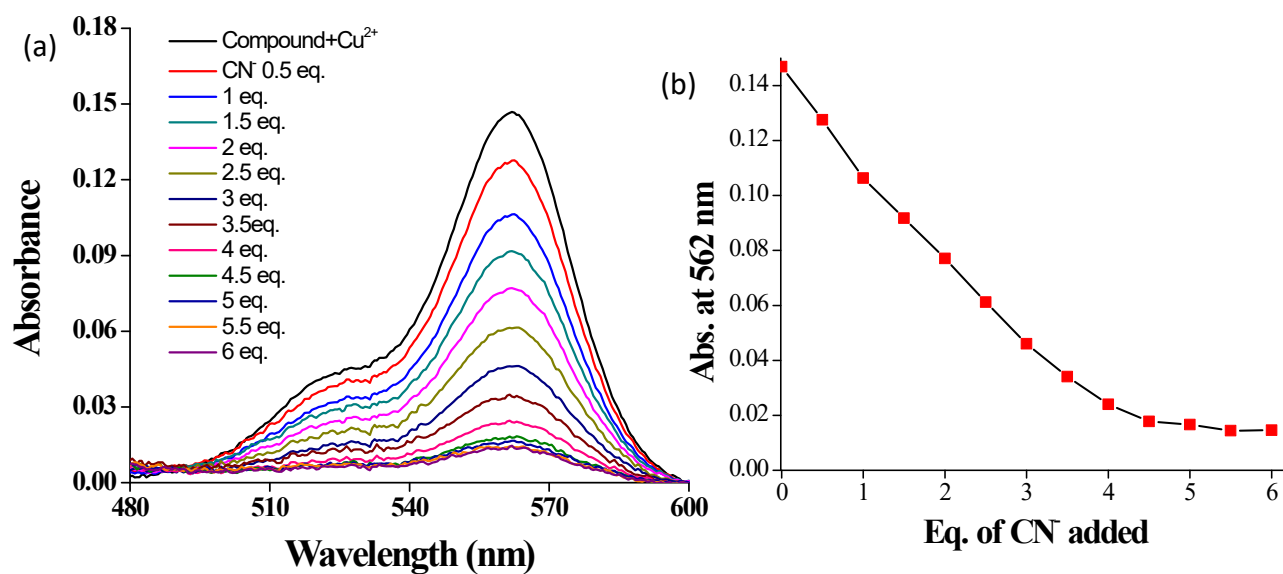

**Fig. S16** (a) UV-vis titration of **1** (10 μM) in acetonitrile-water pH 7.4 (1:1) with the gradual addition of CN<sup>-</sup> in presence of Cu<sup>2+</sup> (1:1). (b) Plot of the absorbance at 562 nm with added CN<sup>-</sup> in μM.

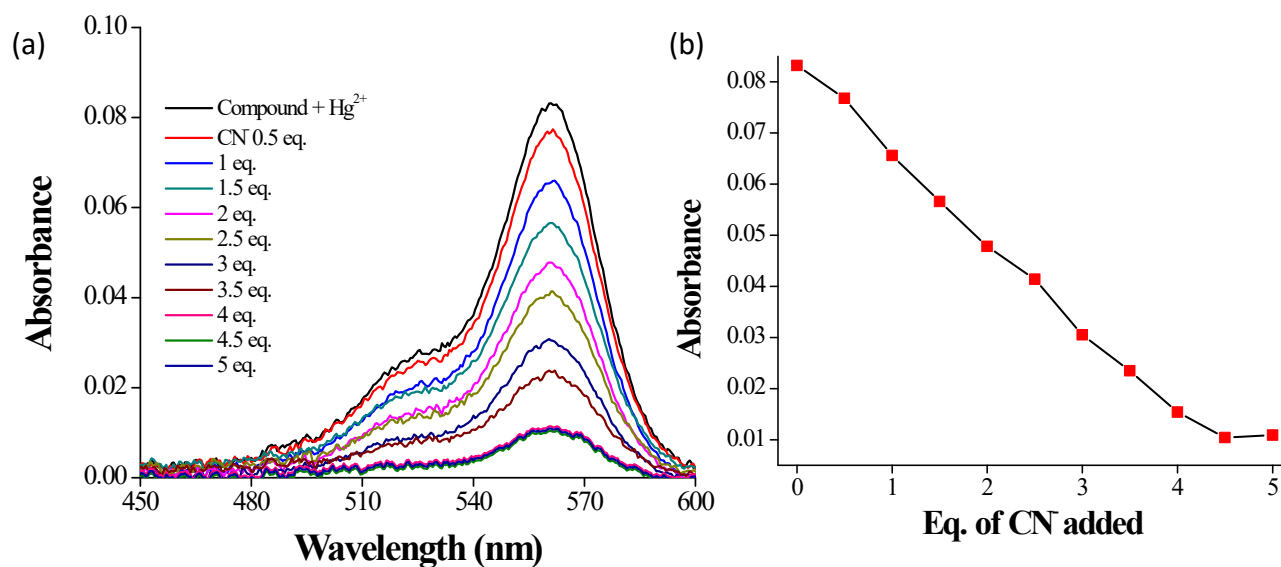

**Fig. S17** (a) UV-vis titration of **1** (10 μM) in acetonitrile-water pH 7.4 (1:1) with the gradual addition of CN<sup>-</sup> in presence of Hg<sup>2+</sup> (1:1). (b) Plot of the absorbance at 562 nm with added CN<sup>-</sup> in μM.

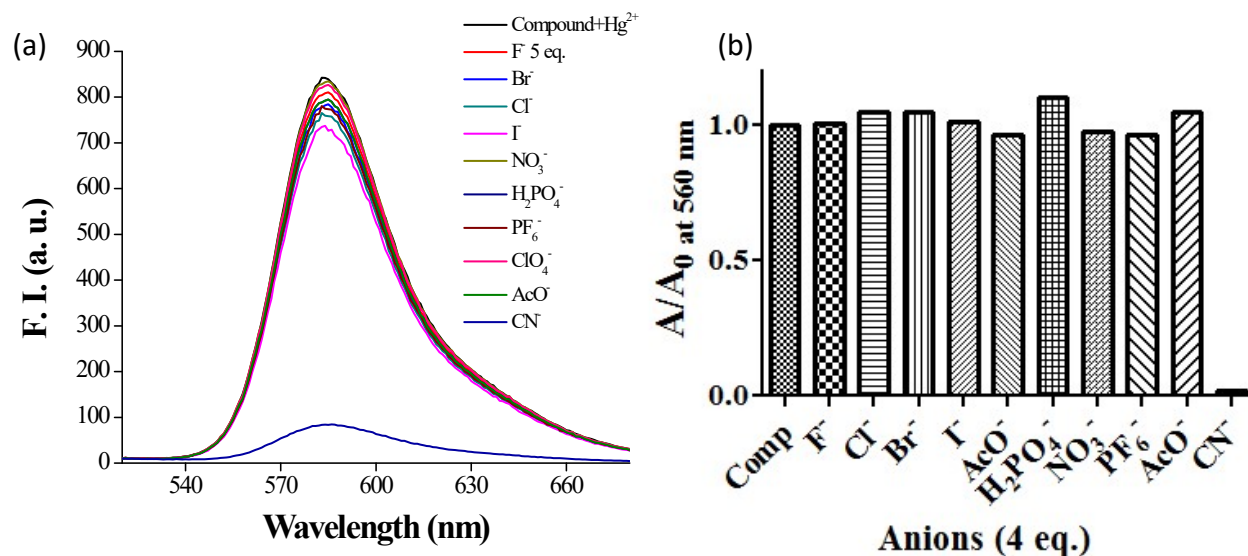

**Fig. S18** (a) Fluorescence spectra of **1** (5  $\mu\text{M}$ ) in acetonitrile-water (pH 7.4) 1:1 medium ( $\lambda_{\text{ex.}} = 510 \text{ nm}$ ) upon addition of different anions in presence of  $\text{Hg}^{2+}$  (1:1). (b) Plot of the fluorescence intensity at 585 with added  $\text{Hg}^{2+}$  ion in  $\mu\text{M}$ .

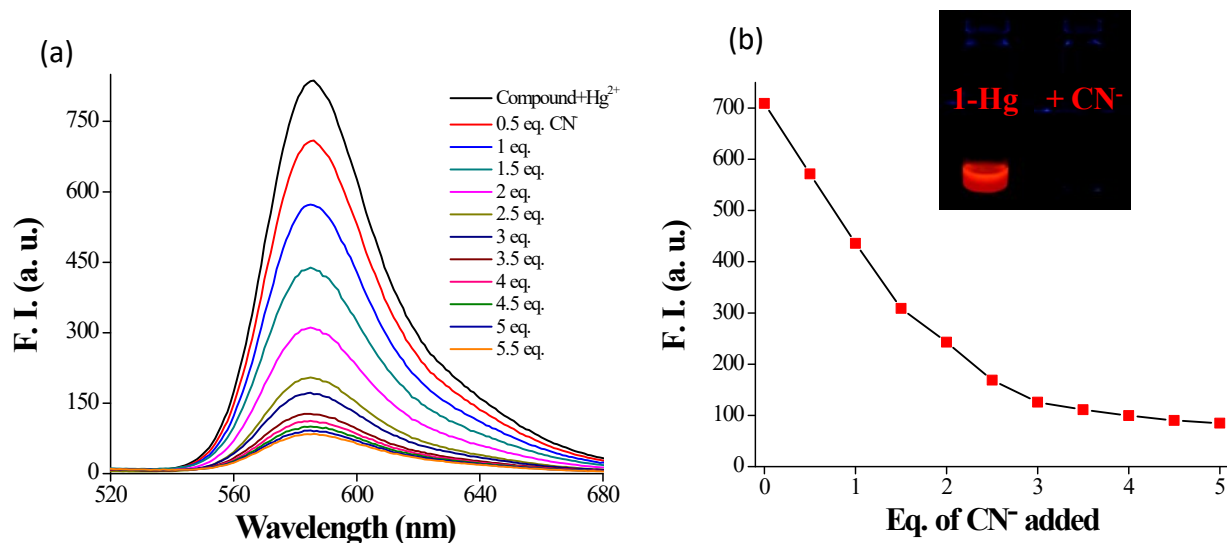

**Fig. S19** (a) Fluorescence titration of **1** (5  $\mu\text{M}$ ) in acetonitrile-water (pH 7.4) 1:1 medium ( $\lambda_{\text{ex.}} = 510 \text{ nm}$ ) with the gradual addition of  $\text{CN}^-$  in presence of  $\text{Hg}^{2+}$ . (b) Plot of the fluorescence intensity at 585 with added equiv. of  $\text{CN}^-$  ion.

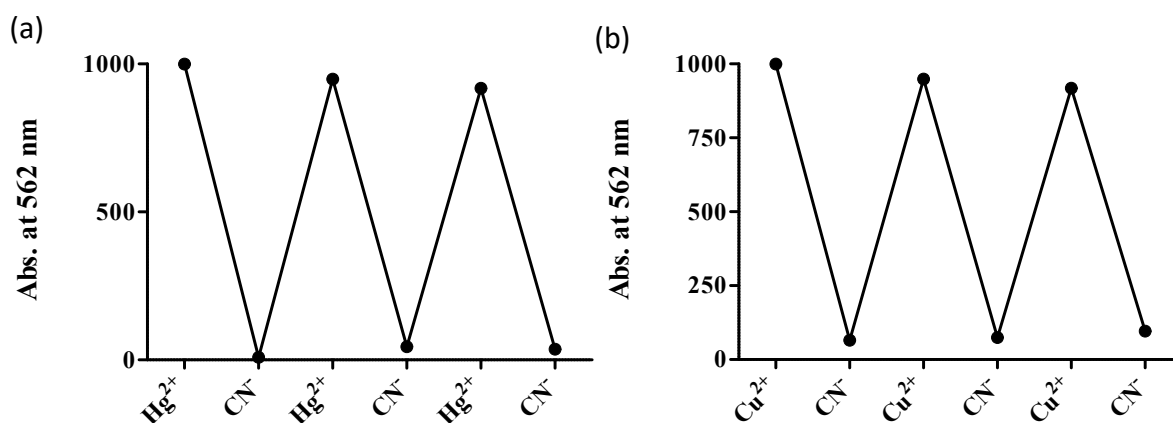

**Fig. S20** Experimental evidence for reversible interaction of CN<sup>-</sup> interaction in presence of Hg<sup>2+</sup> and Cu<sup>2+</sup>.

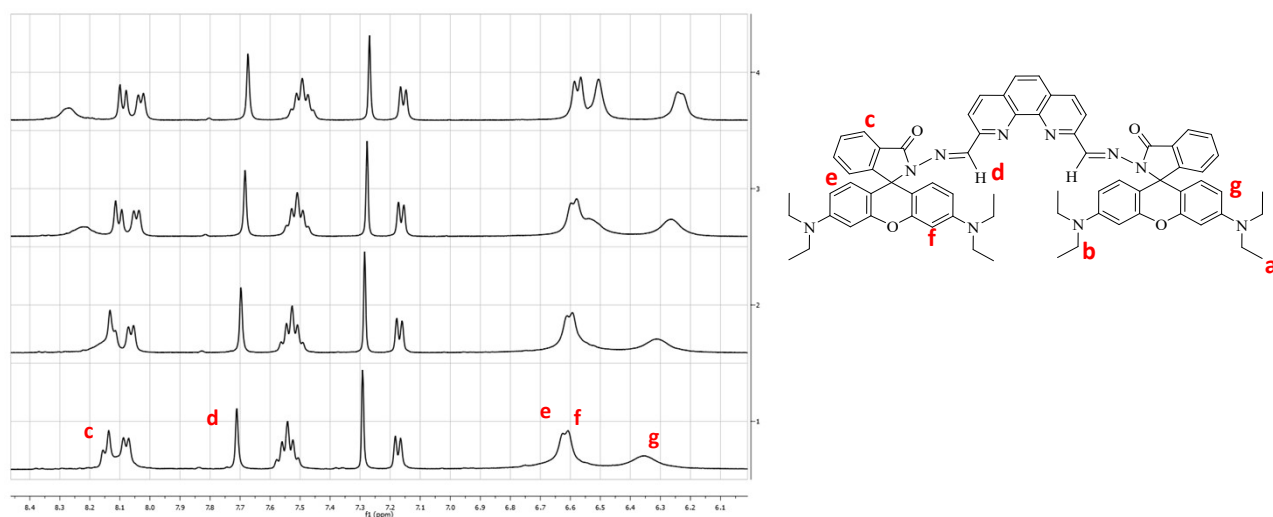

**Fig. S21** Change in partial <sup>1</sup>H-NMR spectra of **1** upon gradual addition of CN<sup>-</sup> in presence of Hg<sup>2+</sup> (1:1) in CDCl<sub>3</sub> medium (molecular structure has been shown).

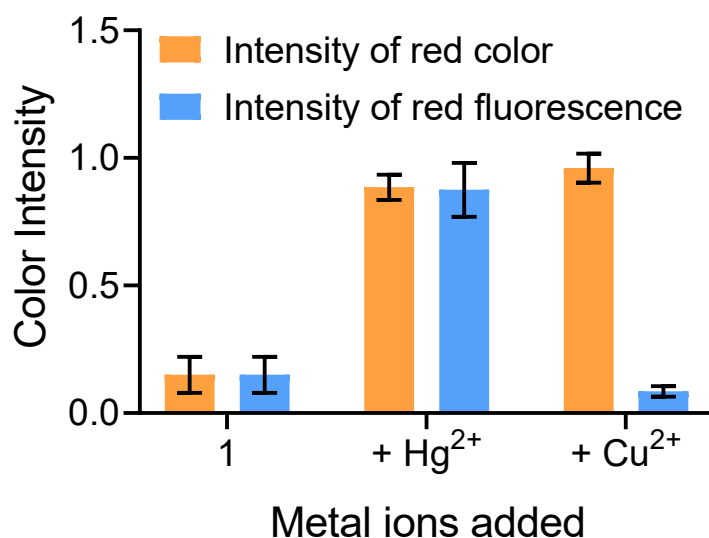

**Fig. S22** The paper-discs upon addition of Cu<sup>2+</sup> and Hg<sup>2+</sup>: Changes in red color under normal day-light and changes in red fluorescence under long UV-lamp.

#### 4. Considering the absorption changes of **1** upon interaction with Cu<sup>2+</sup> and I<sup>-</sup>

**Table S1:** Truth table for binary arithmetic absorption responses received from **1** upon interaction with Cu<sup>2+</sup> and CN<sup>-</sup>/I<sup>-</sup>, after application of proper thresholds to the corresponding channel.

| Cu <sup>2+</sup> | CN <sup>-</sup> /I <sup>-</sup> | A <sub>562</sub> nm<br>(INHIBIT) |
|------------------|---------------------------------|----------------------------------|
| 0                | 0                               | 0                                |
| 1                | 0                               | 1                                |
| 0                | 1                               | 0                                |
| 1                | 1                               | 0                                |

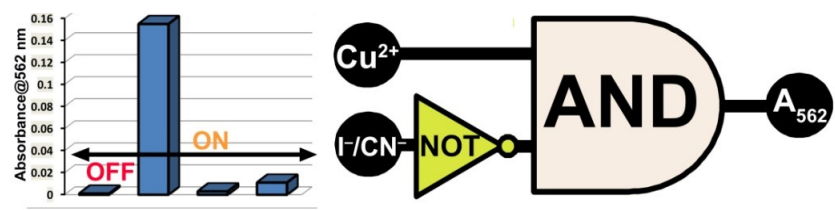

**Fig. S23** Optical bar responses and corresponding schematic logic presentation of INHIBIT logic gate based on absorbance responses of **1** at 562 nm, considering Cu<sup>2+</sup> and CN<sup>-</sup>/I<sup>-</sup> as chemical inputs.
